# Supplementary material
Source: PubMed Central journal article supplement (PMC7126292)

(a) Death

(b) Outpatient visits

Circulatory

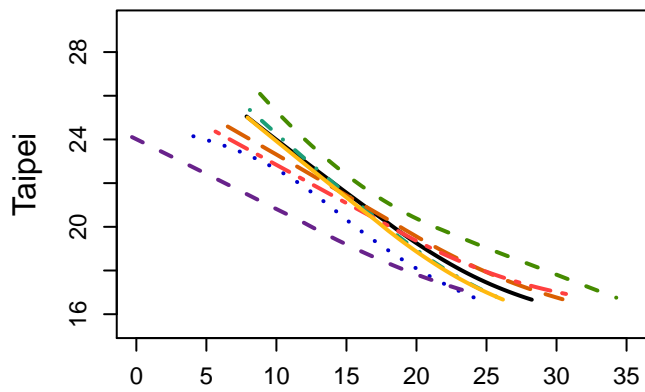

Respiratory

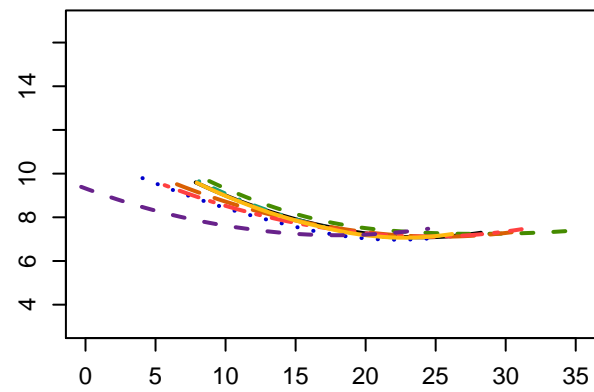

Circulatory

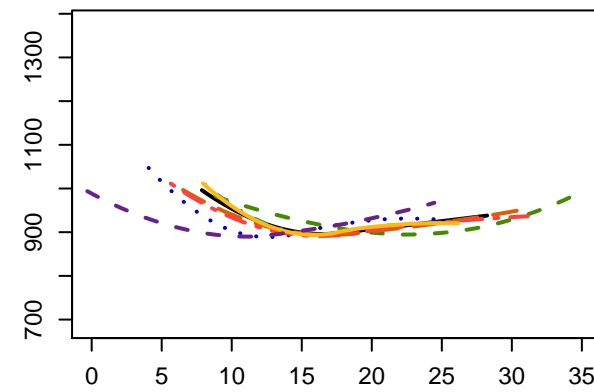

Respiratory

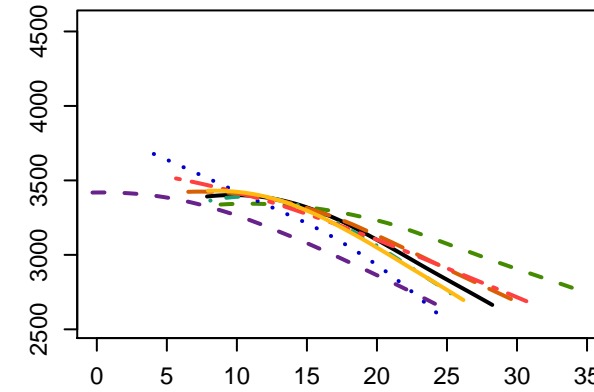

Central Taiwan

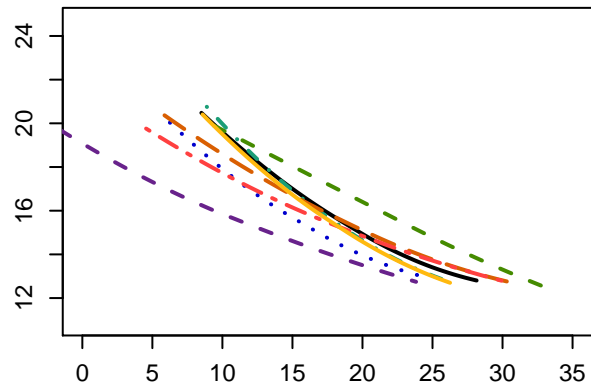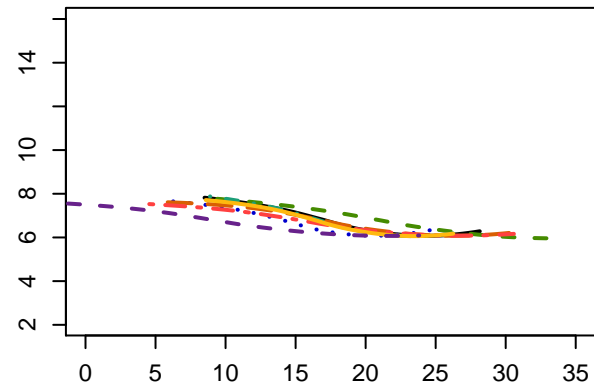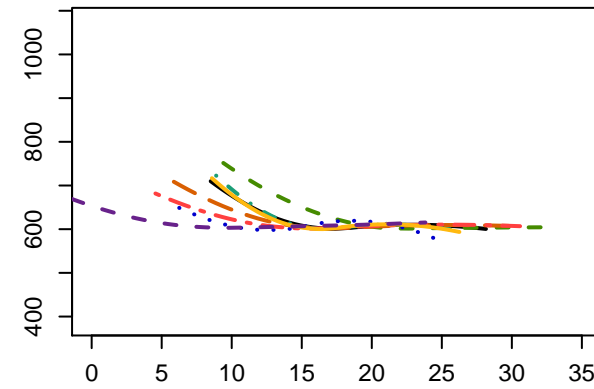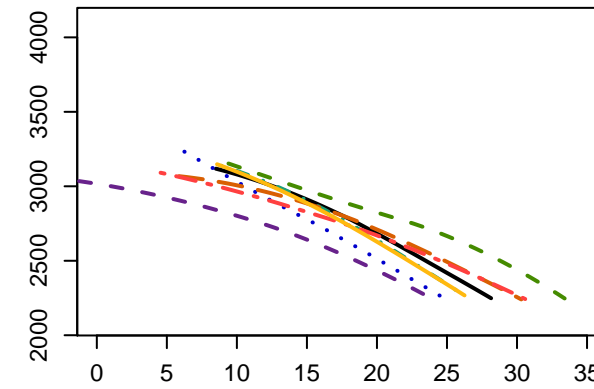

Southern Taiwan

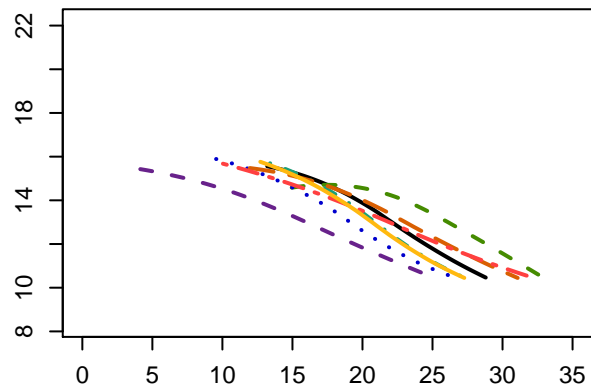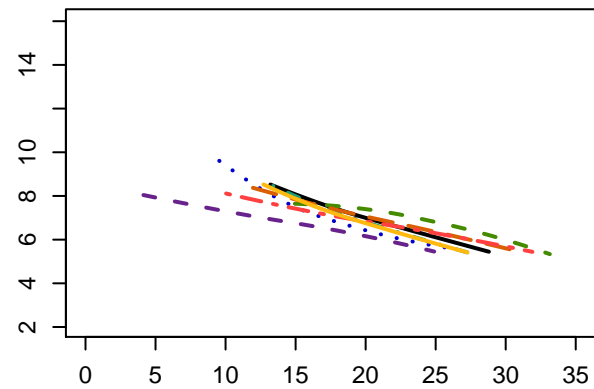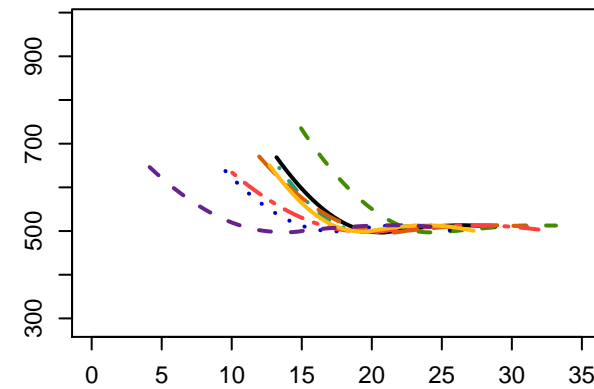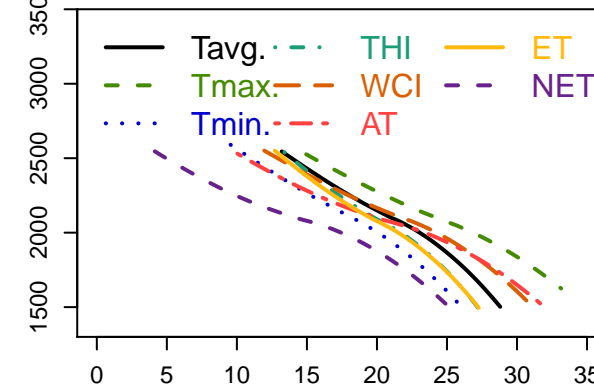

Temperature indices

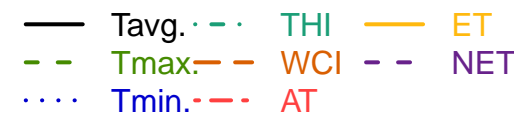

Supplement: mmc2.pdf [file mmc2.pdf]
