# Supplementary material
Source: PubMed Central journal article supplement (PMC7126292)

(a) Relative risk across lags

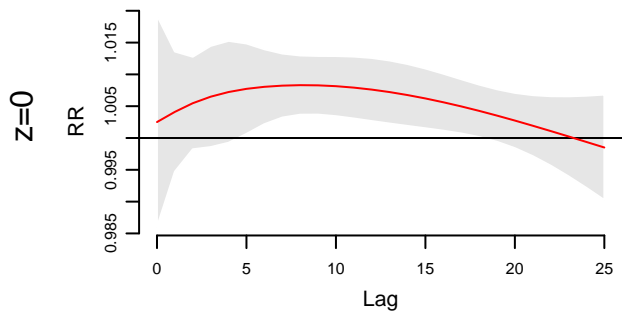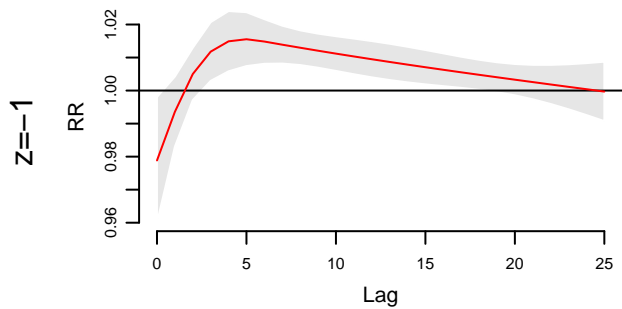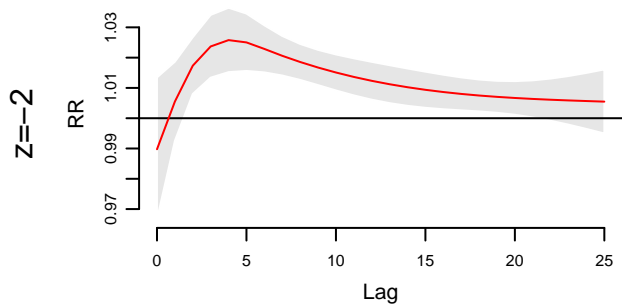

(b) Cumulative relative risk

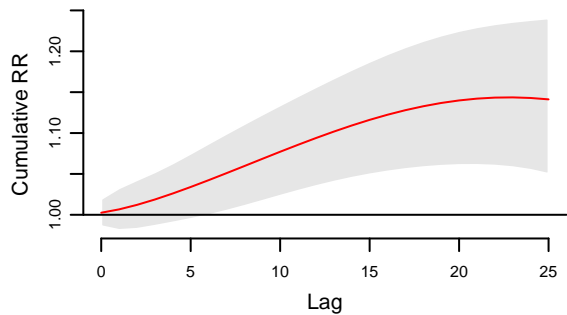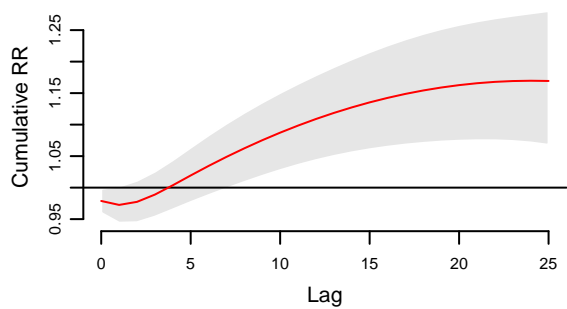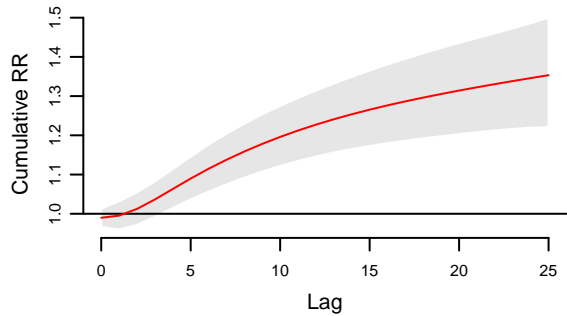

Lag day

Supplement: mmc10.pdf [file mmc10.pdf]

(a) Relative risk across lags

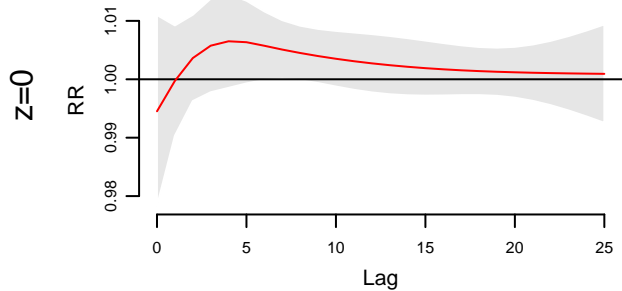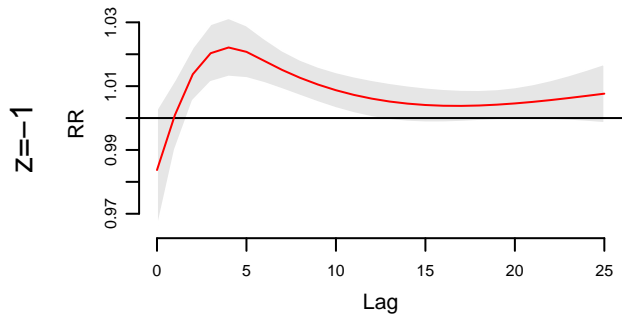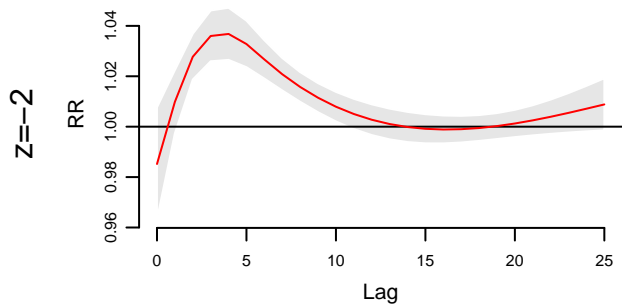

(b) Cumulative relative risk

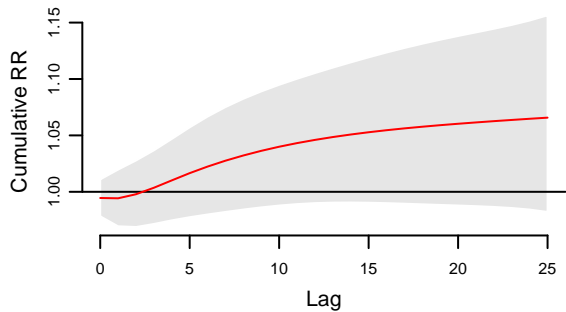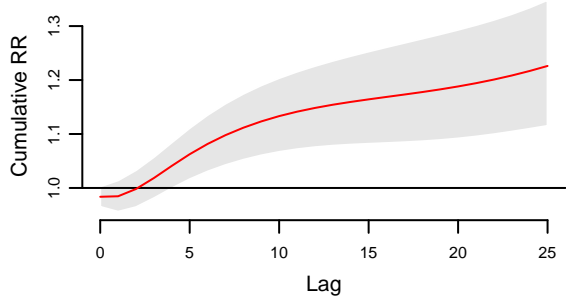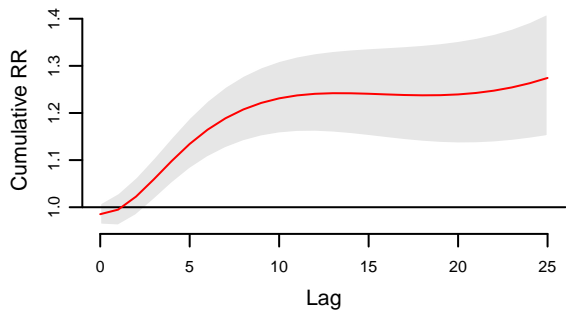

Lag day

Supplement: mmc11.pdf [file mmc11.pdf]

Taipei

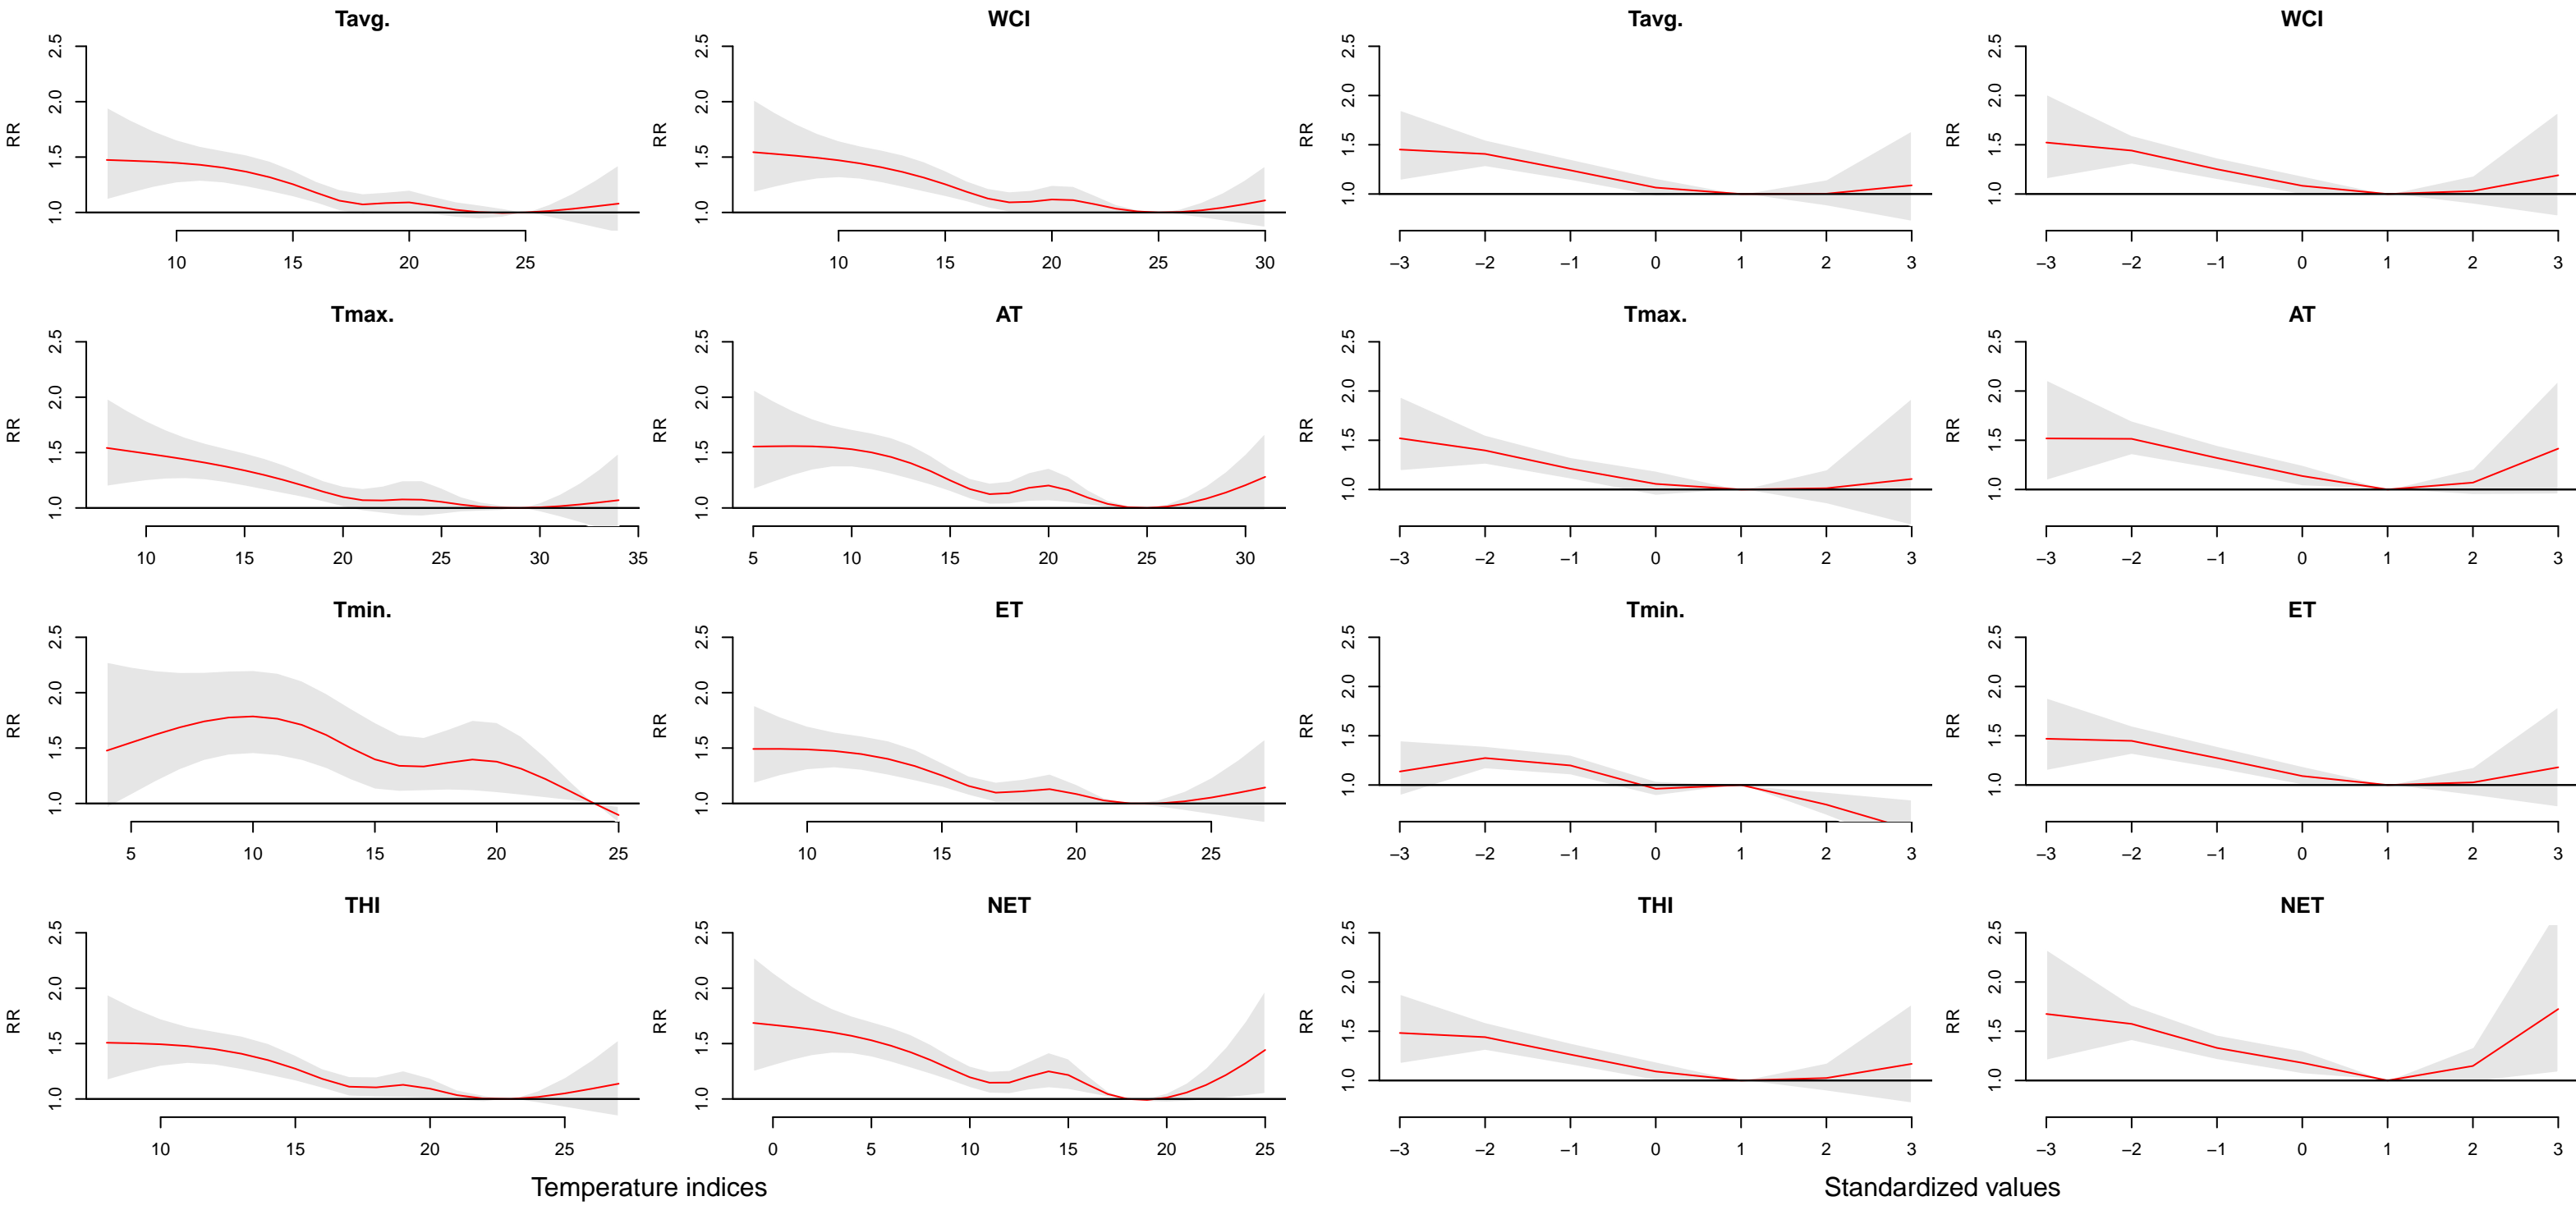

Supplement: mmc3.pdf [file mmc3.pdf]

# Central Taiwan

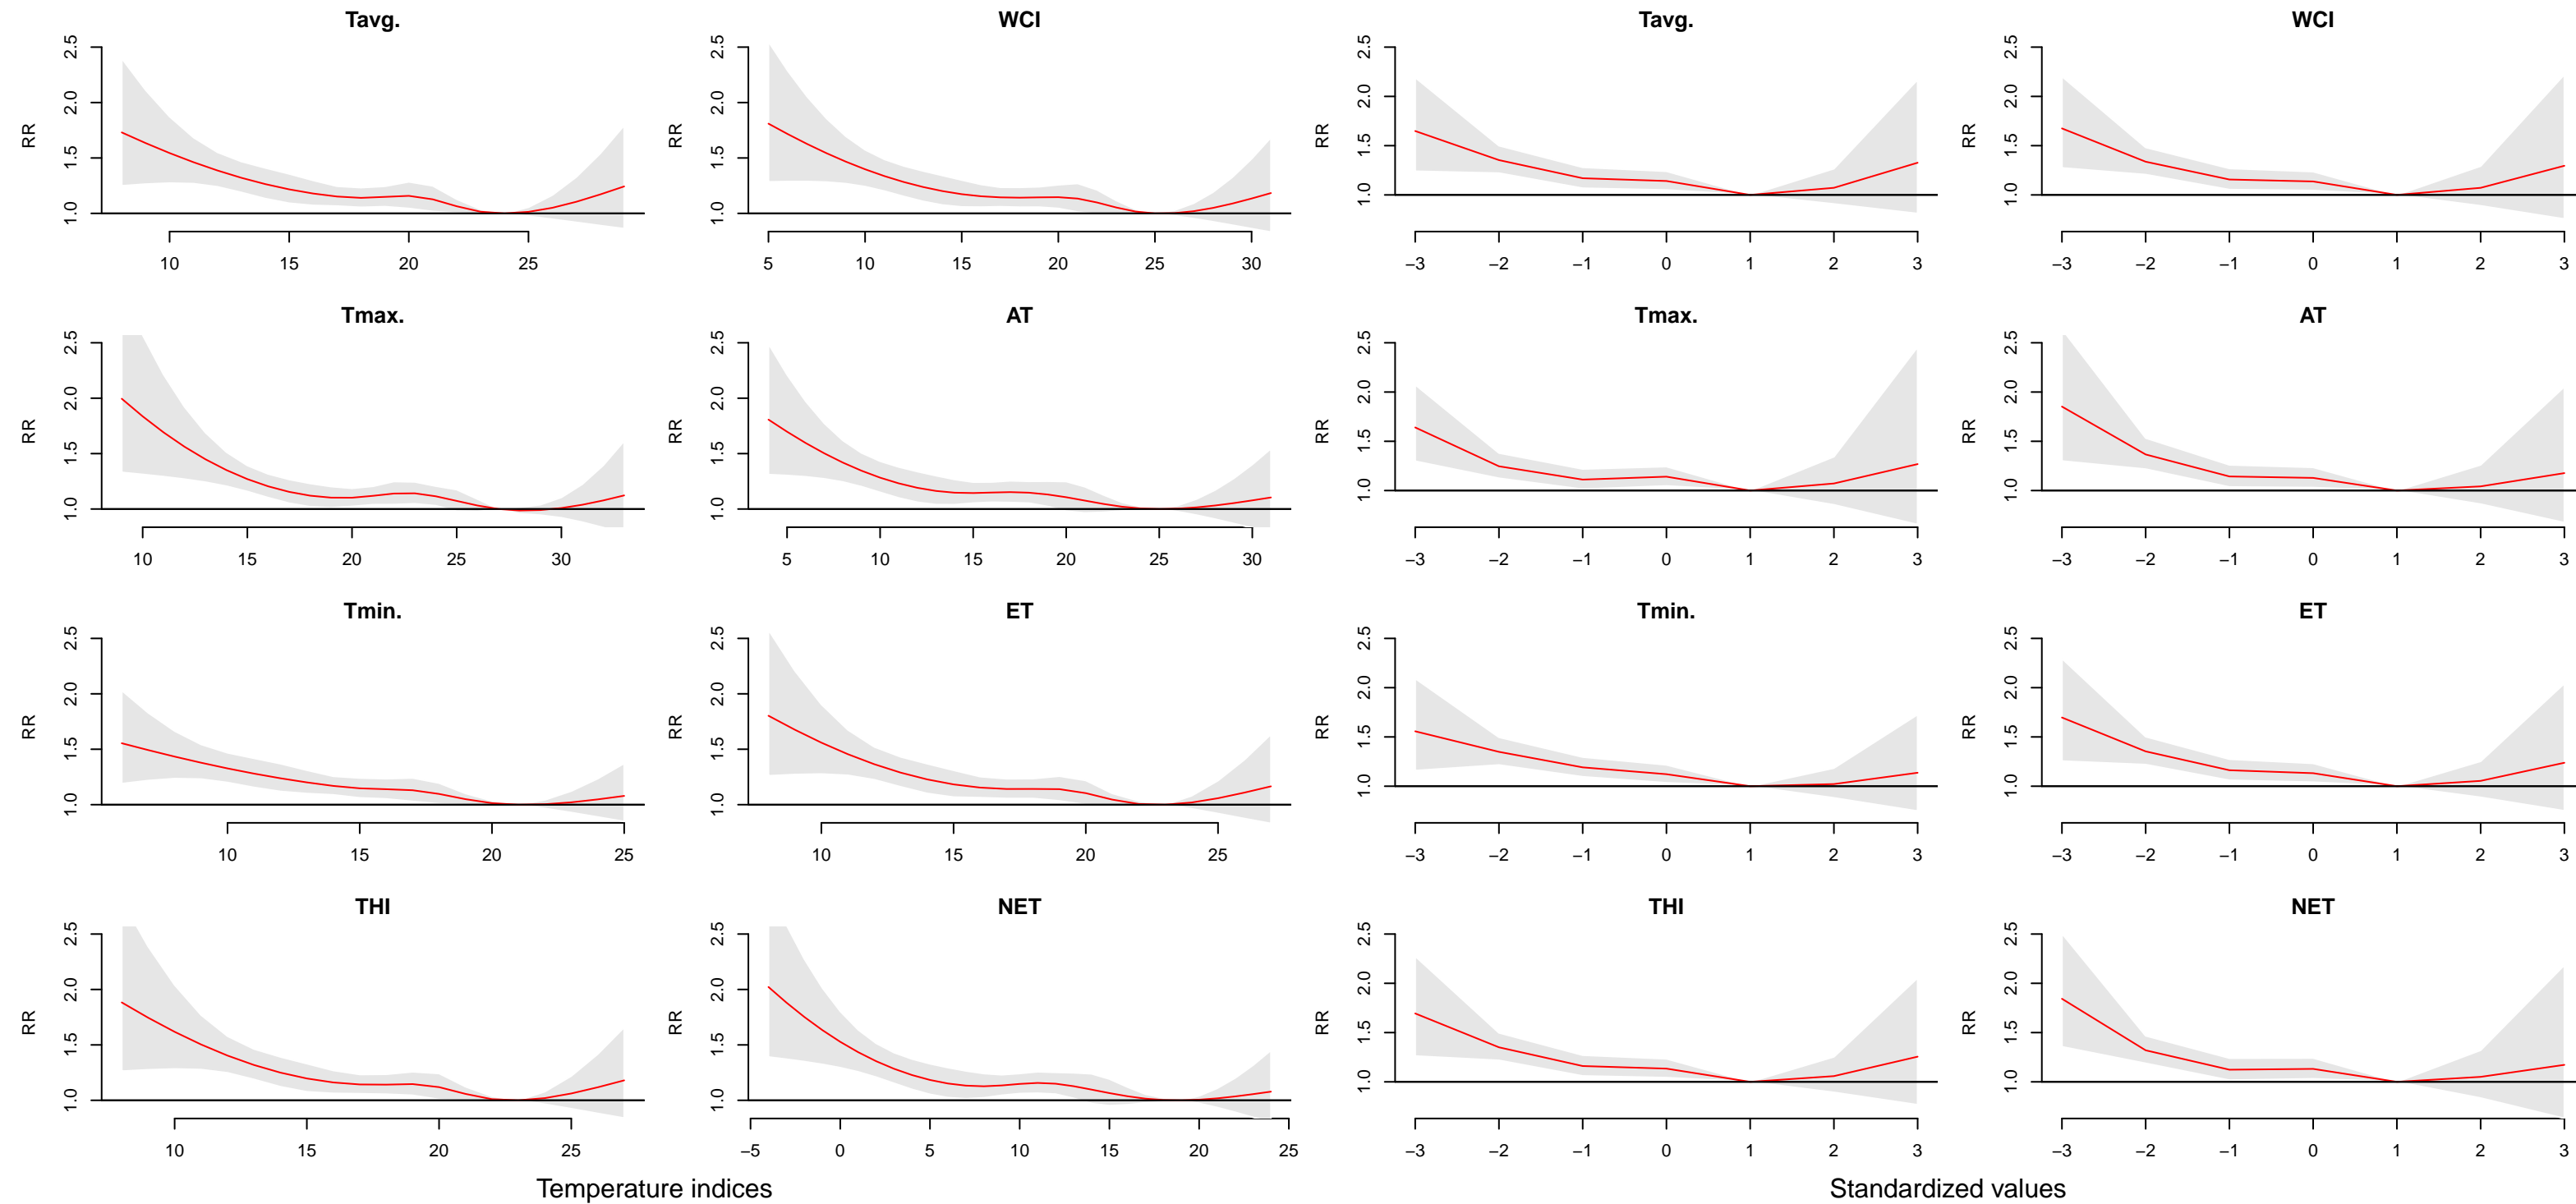

Temperature indices

Standardized values

Supplement: mmc4.pdf [file mmc4.pdf]

Southern Taiwan

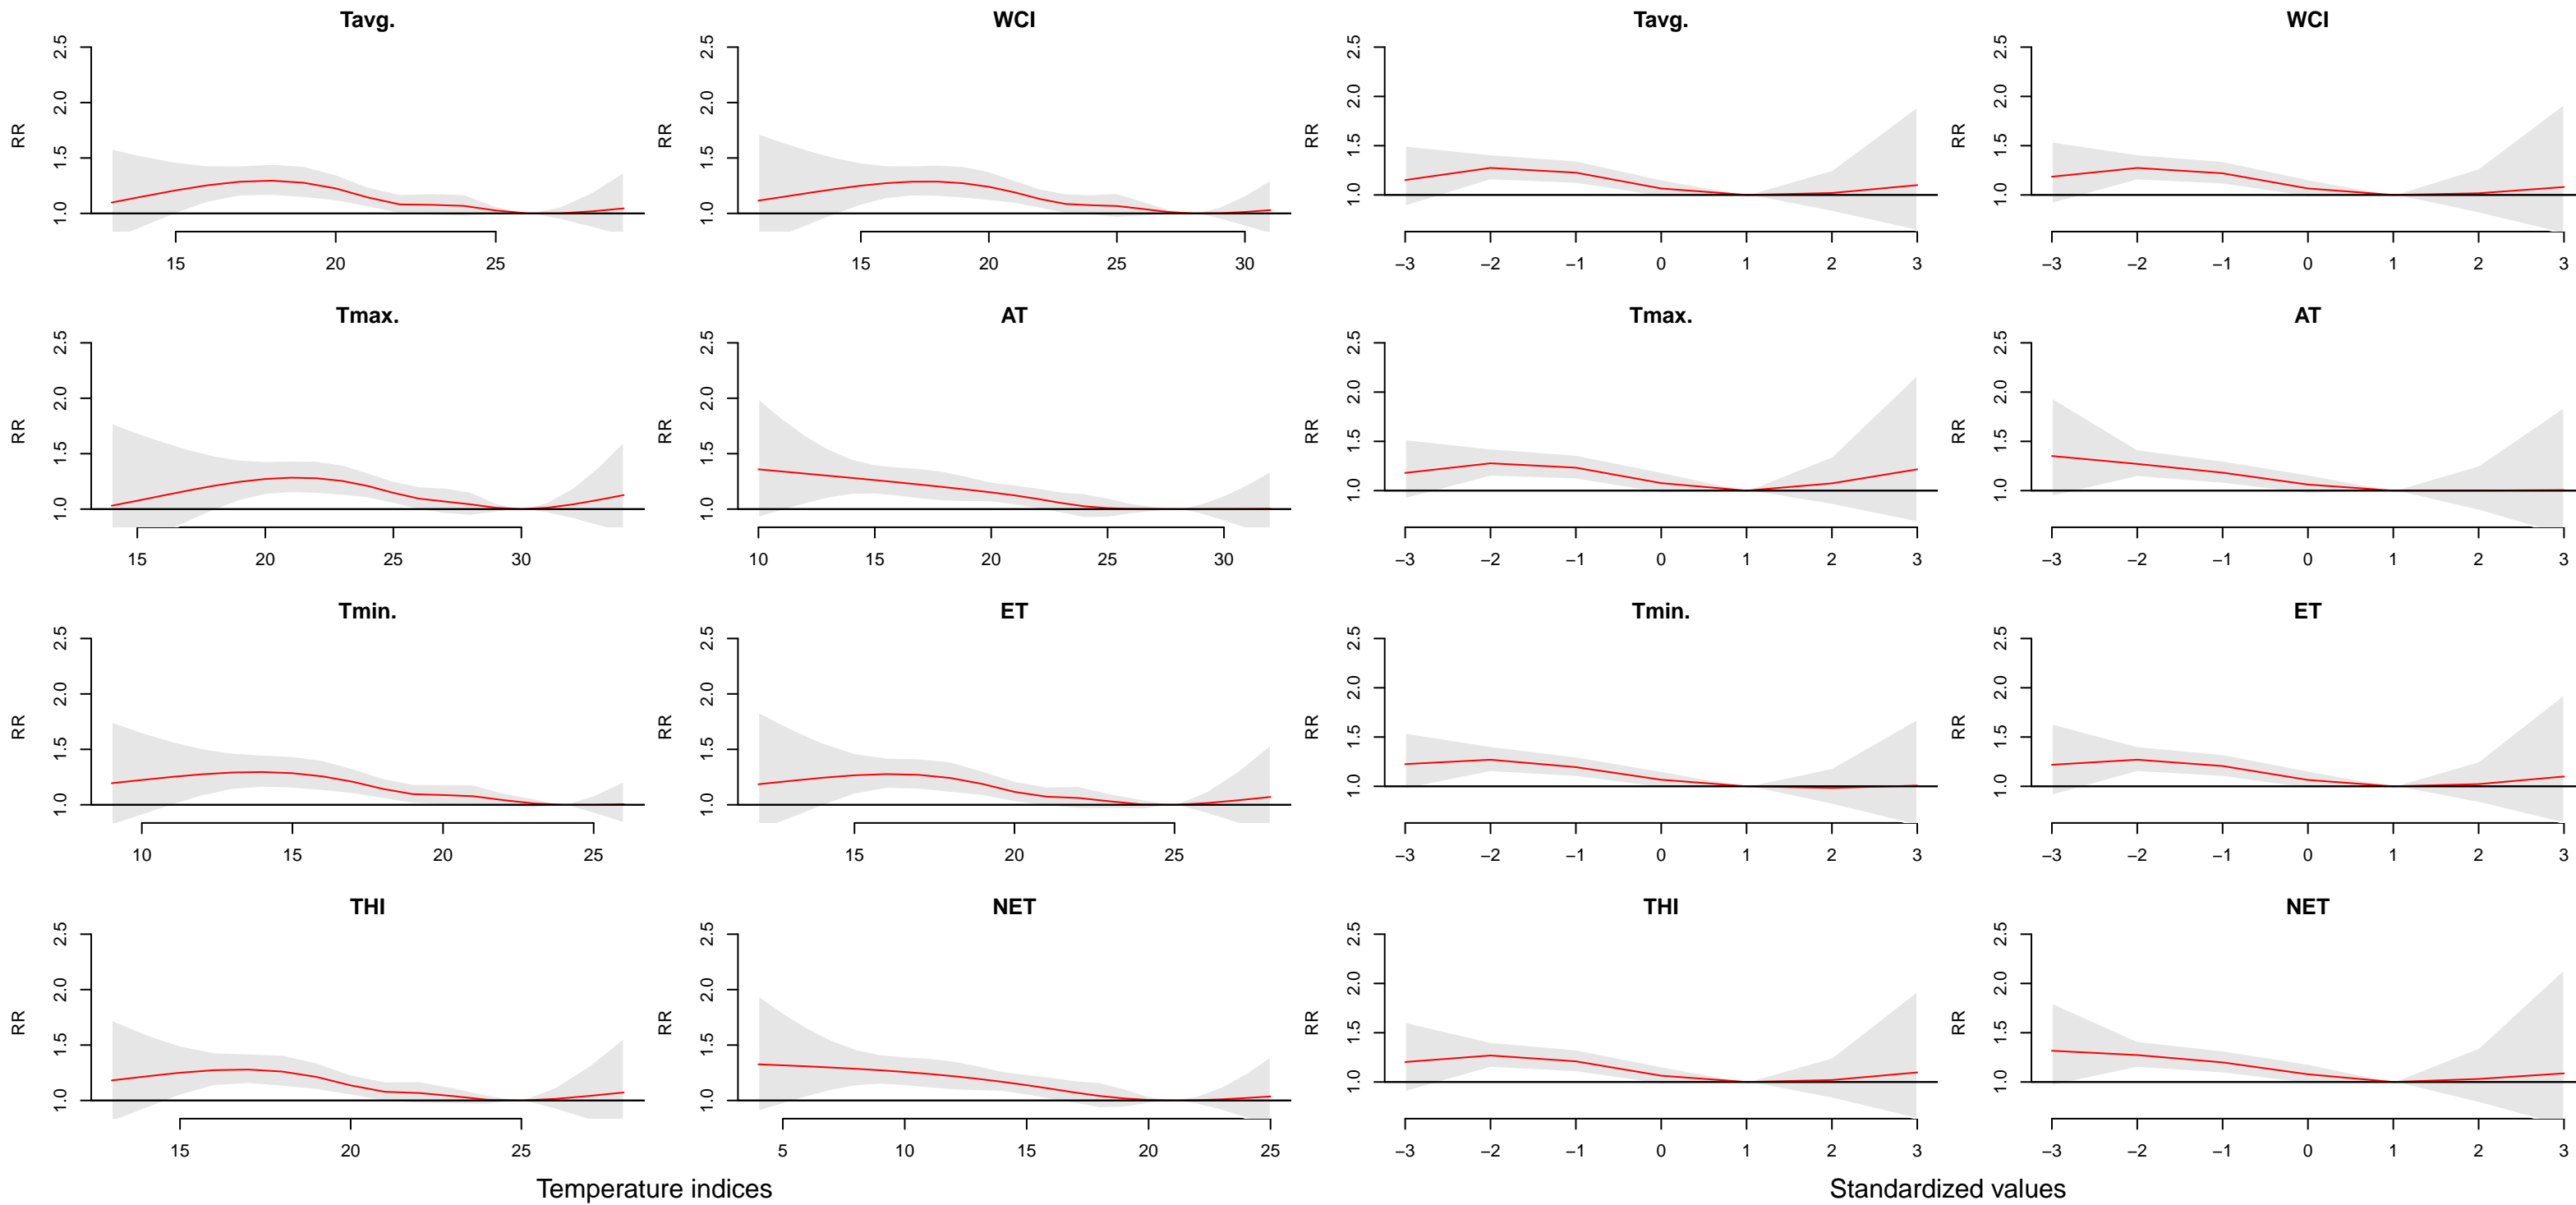

Supplement: mmc5.pdf [file mmc5.pdf]

Taipei

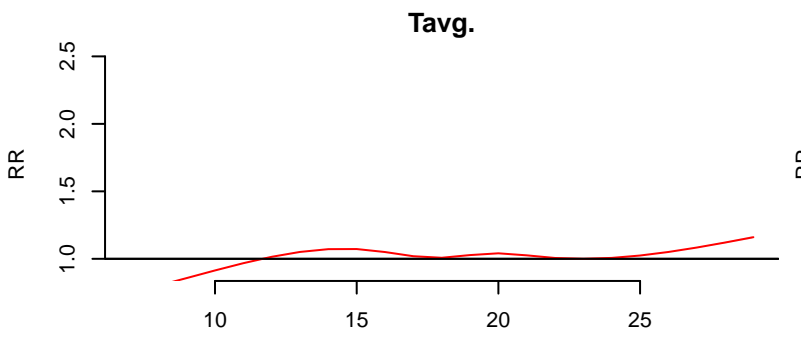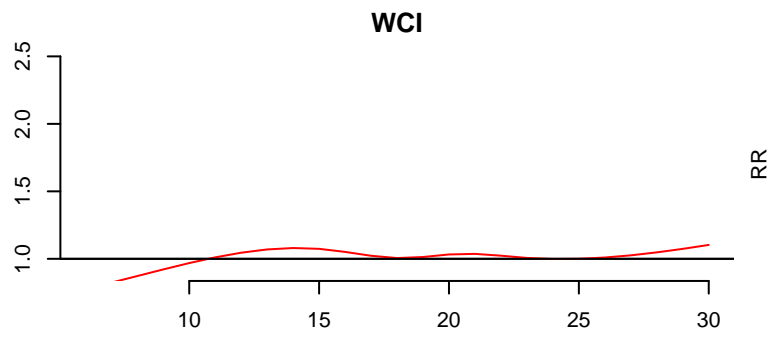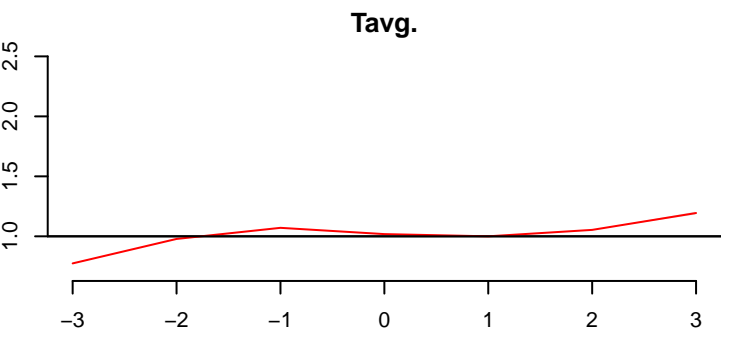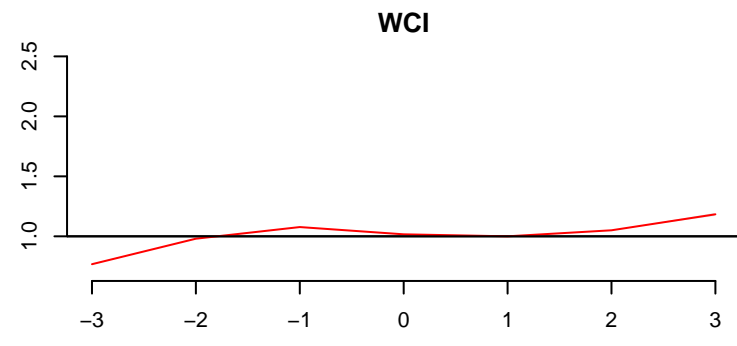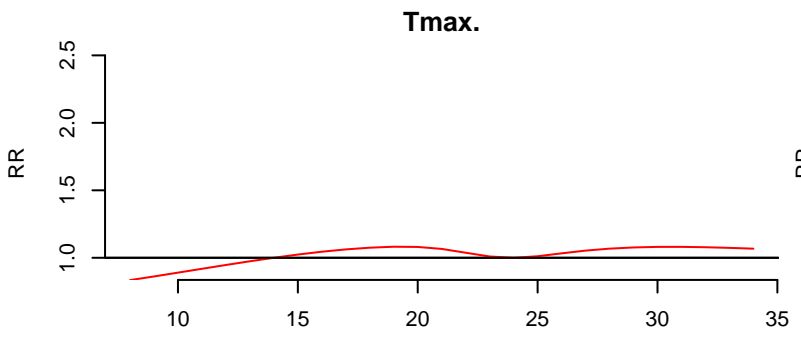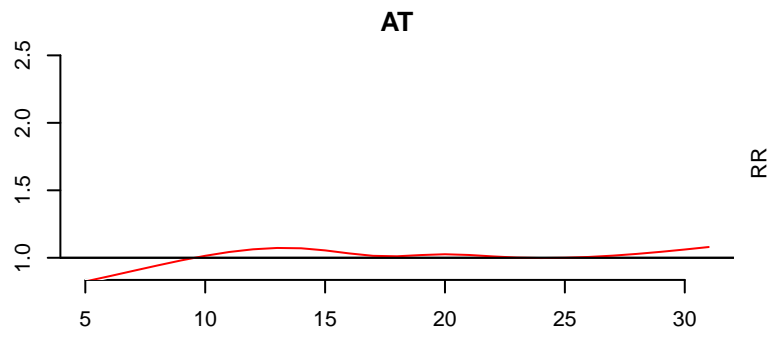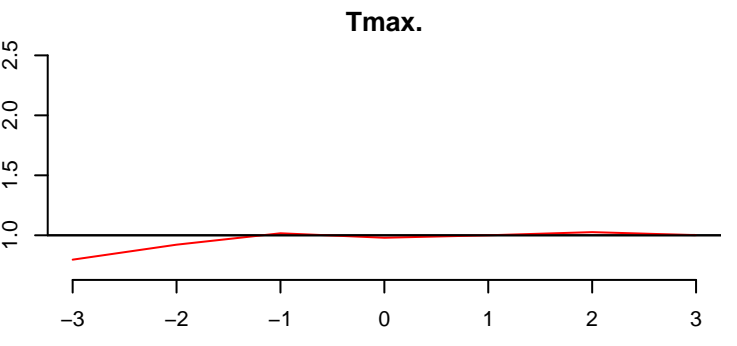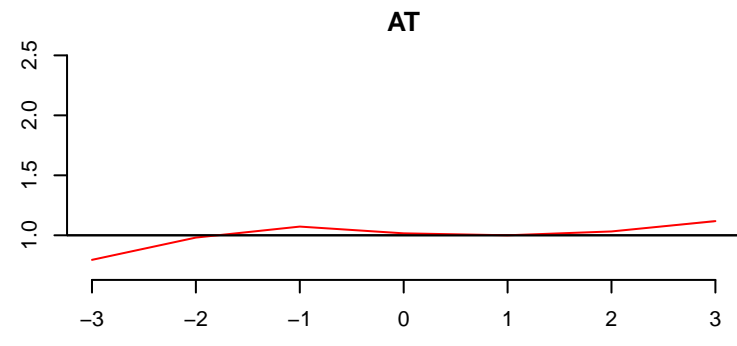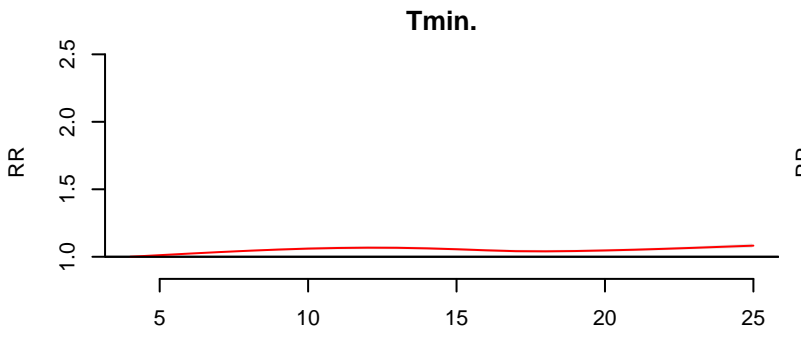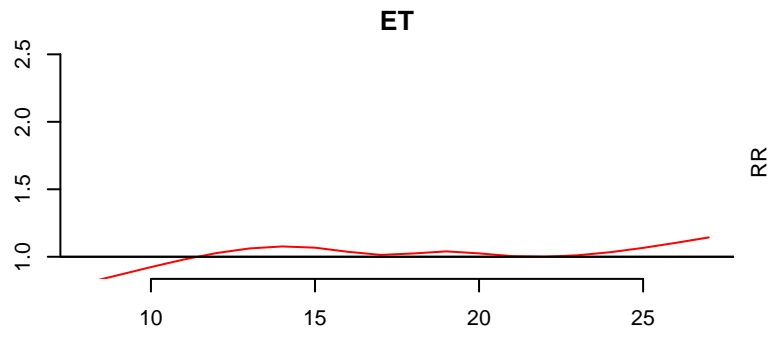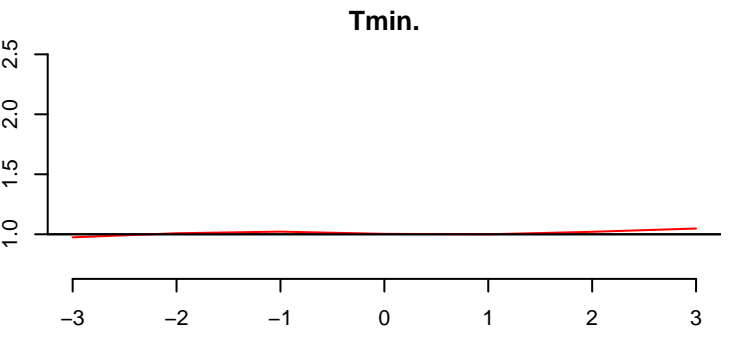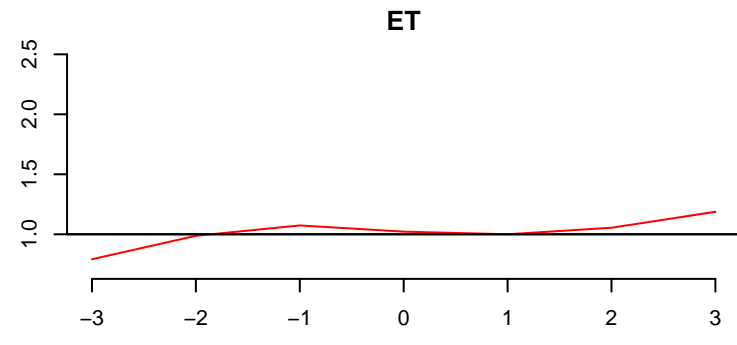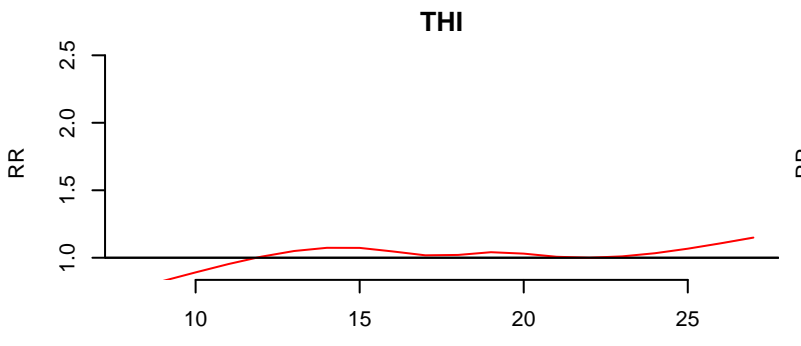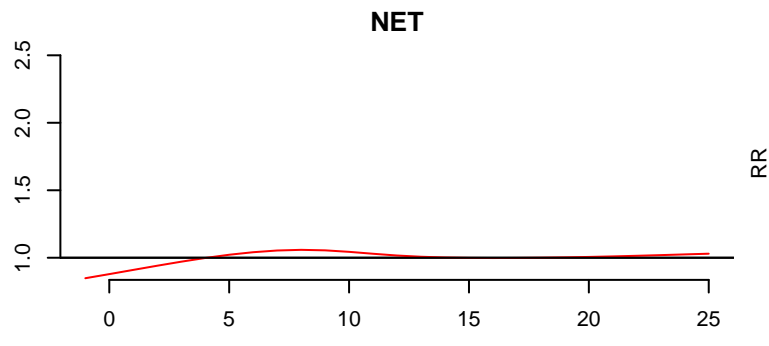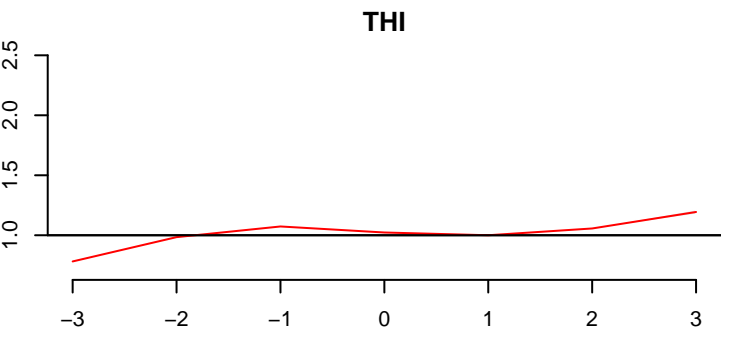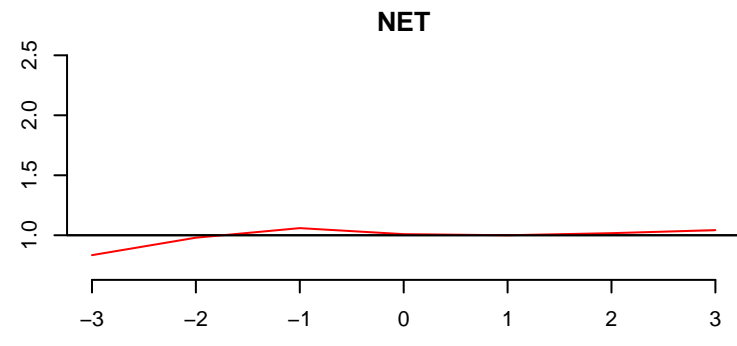

Temperature indices

Standardized values

Supplement: mmc6.pdf [file mmc6.pdf]

Central Taiwan

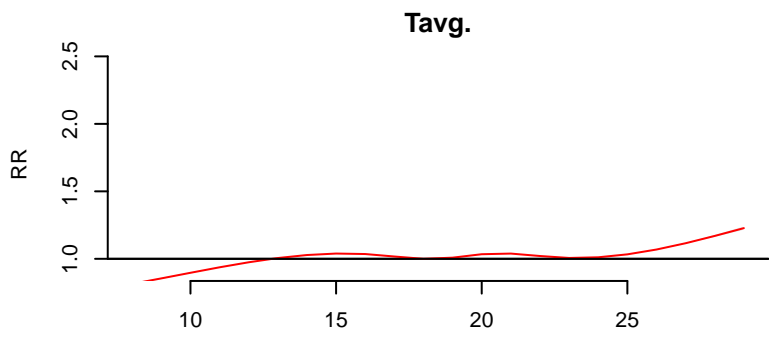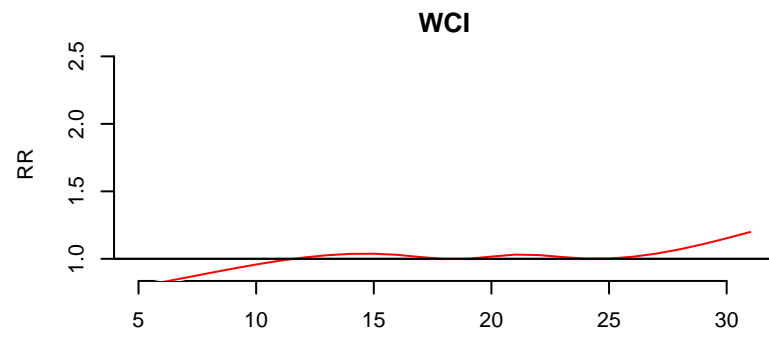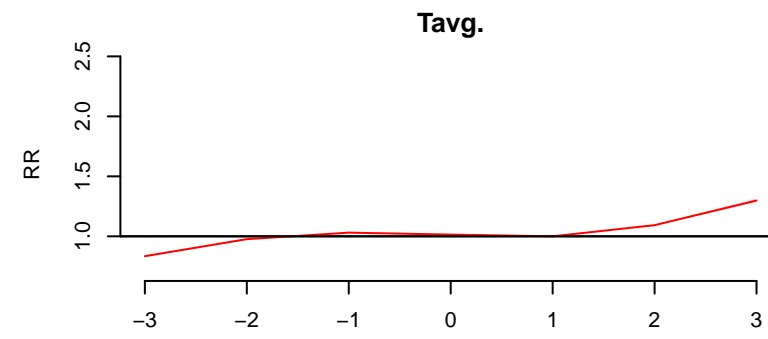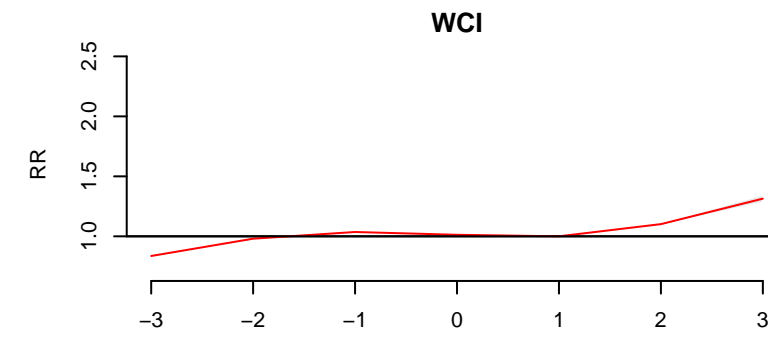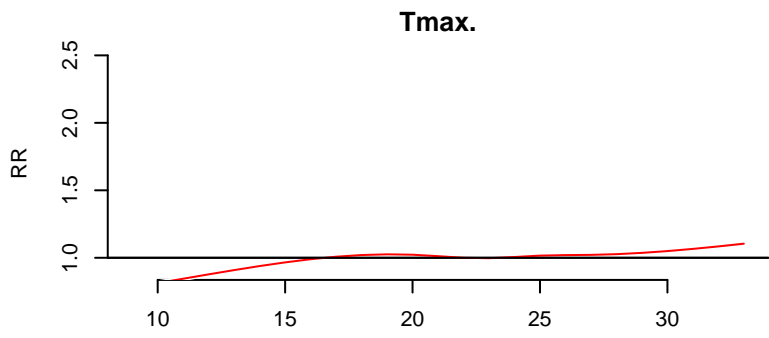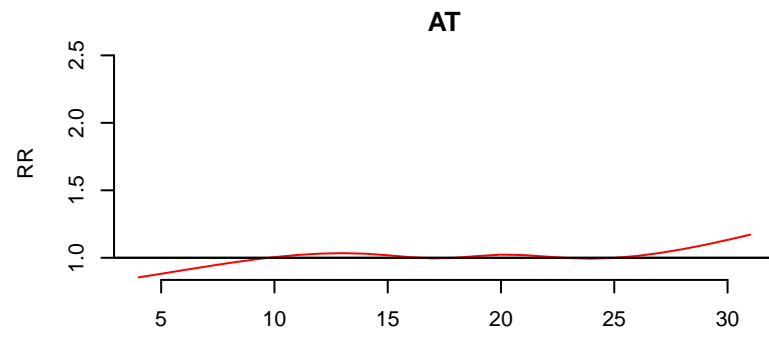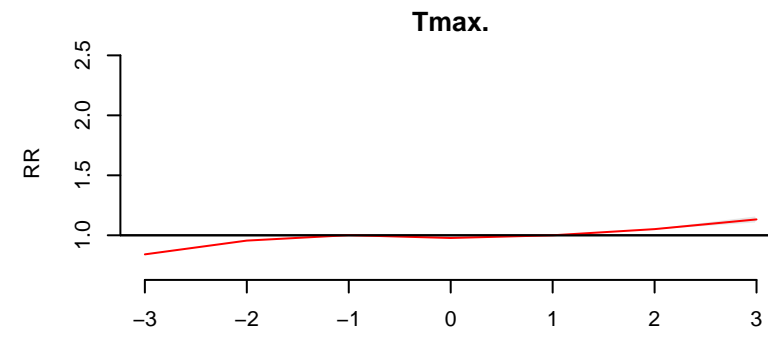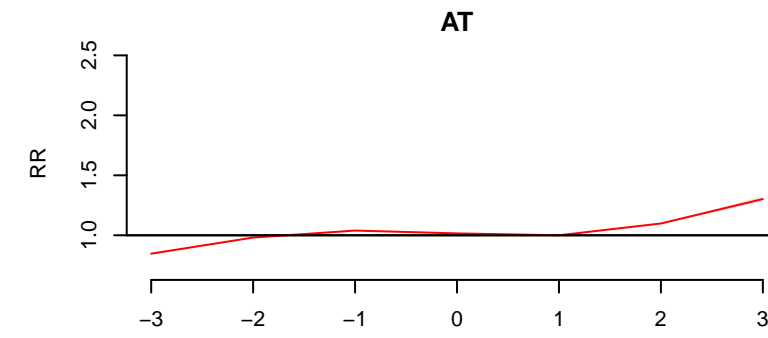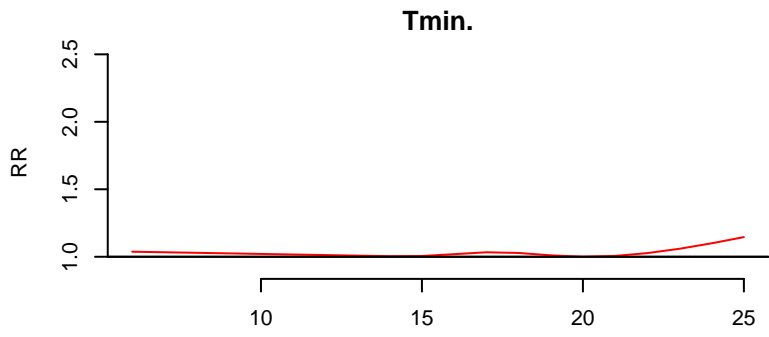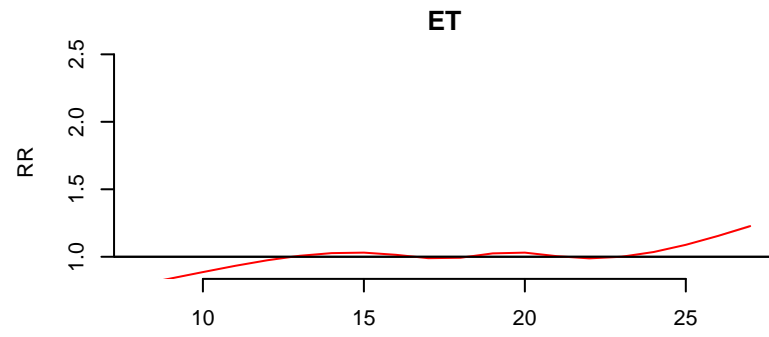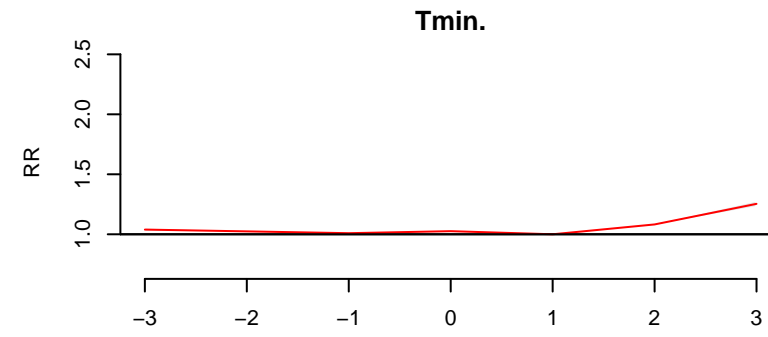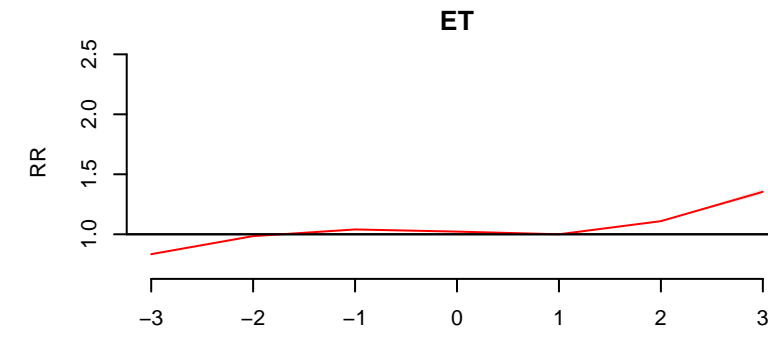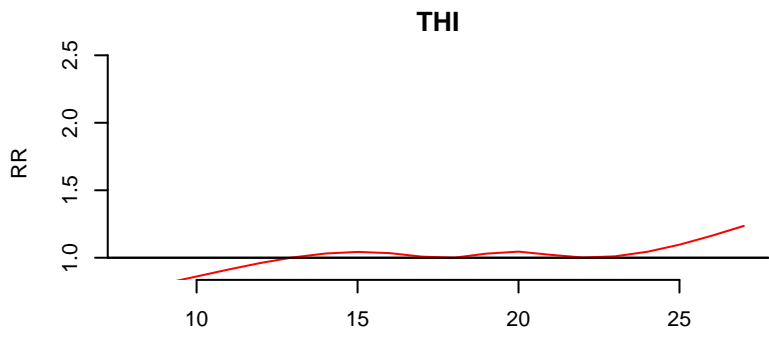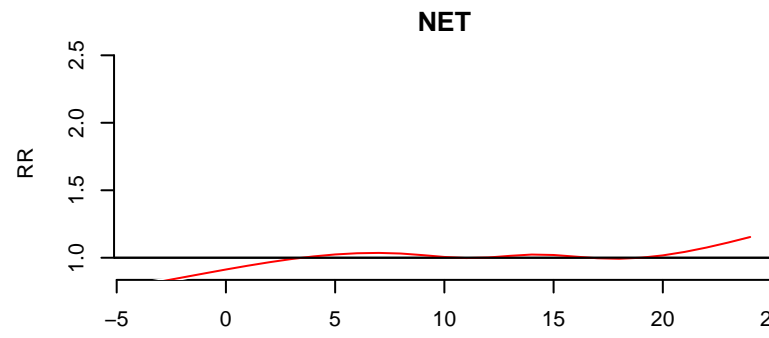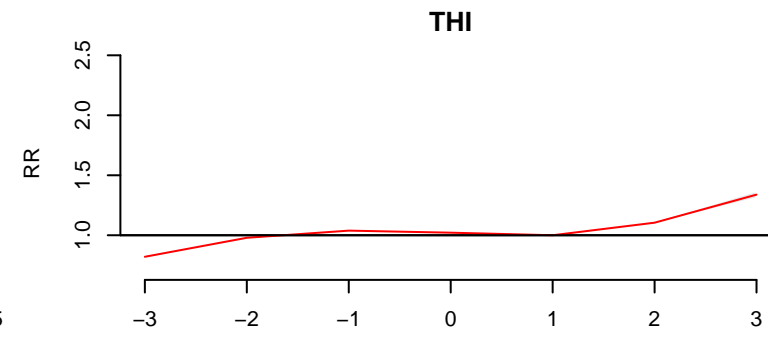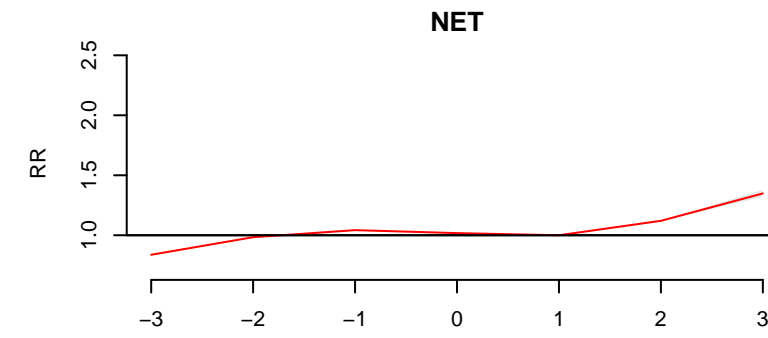

Temperature indices

Standardized values

Supplement: mmc7.pdf [file mmc7.pdf]

Southern Taiwan

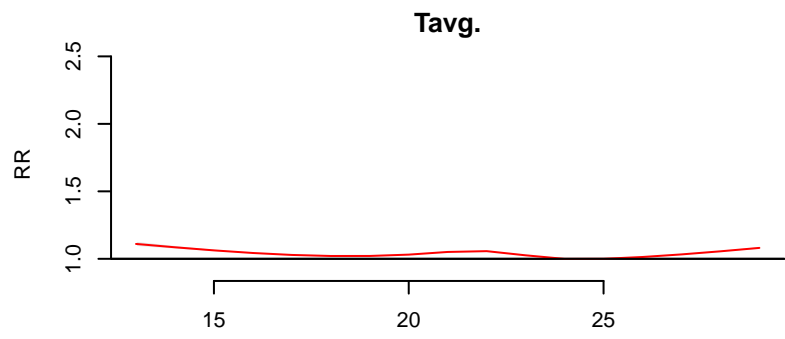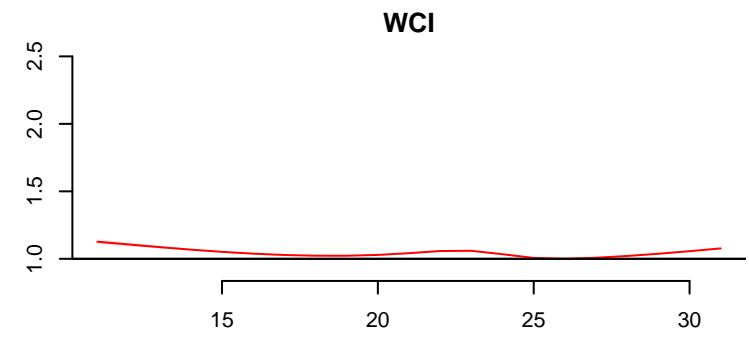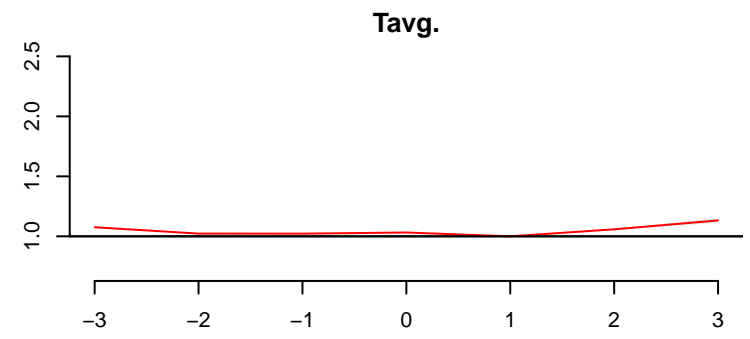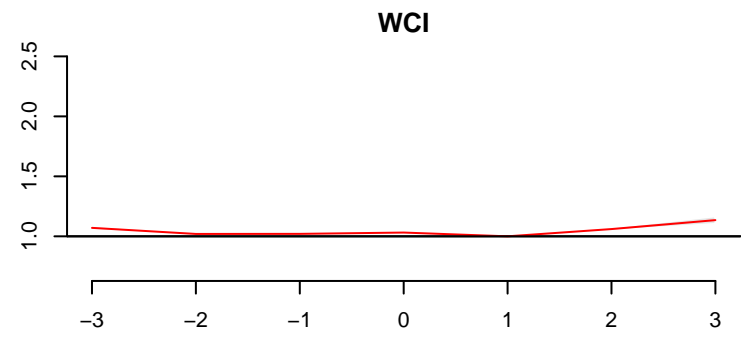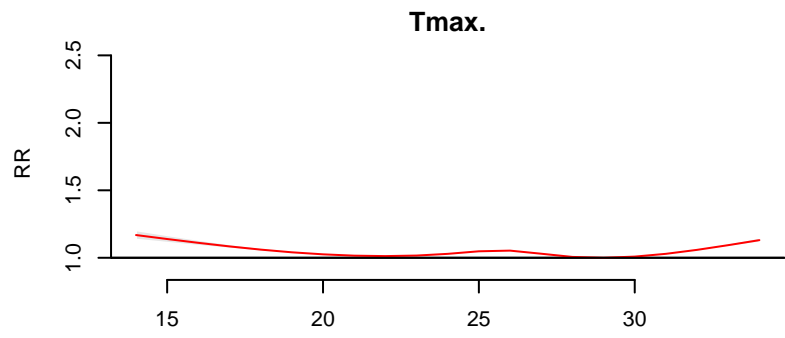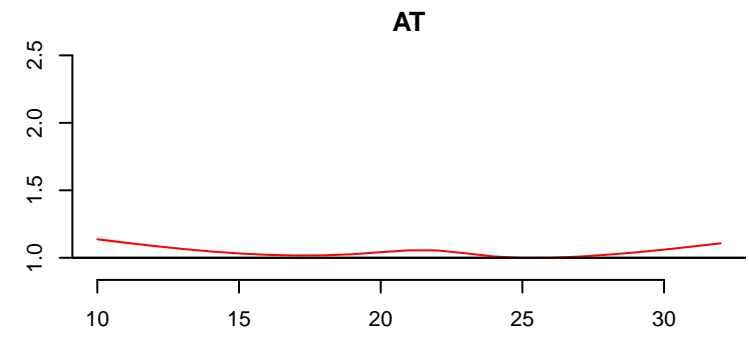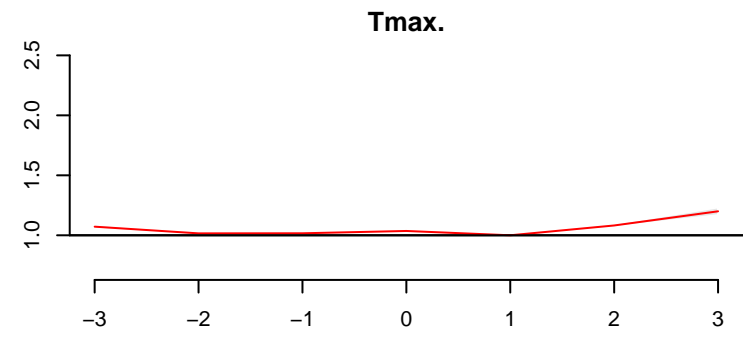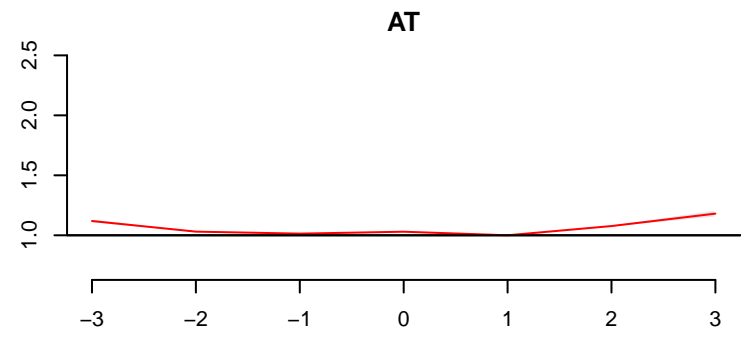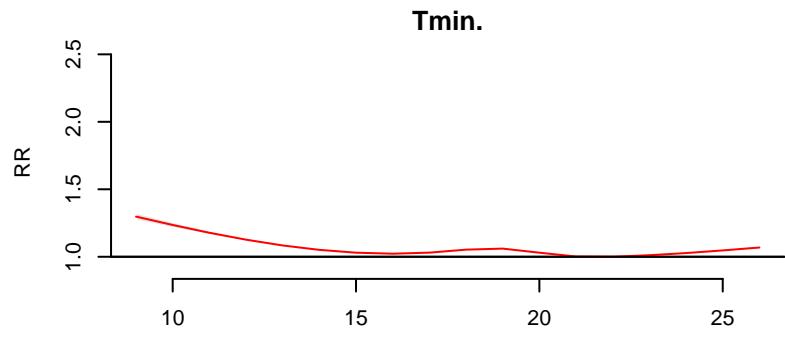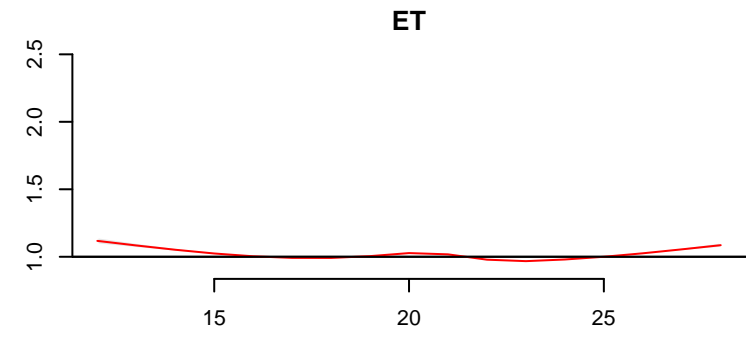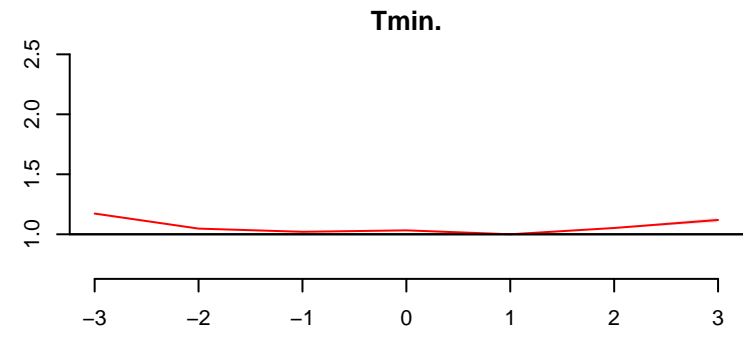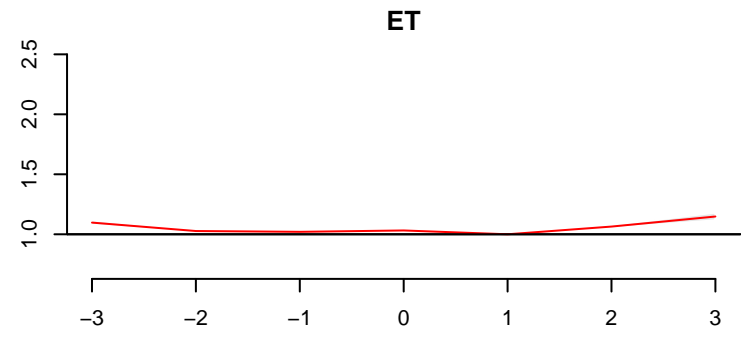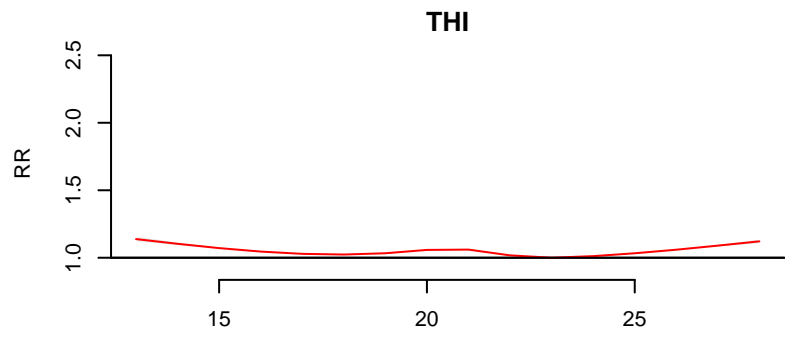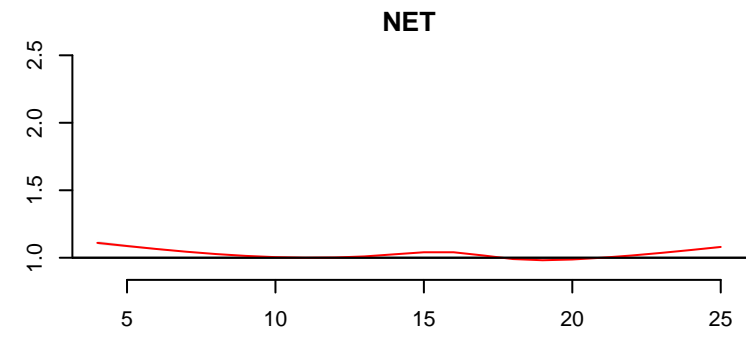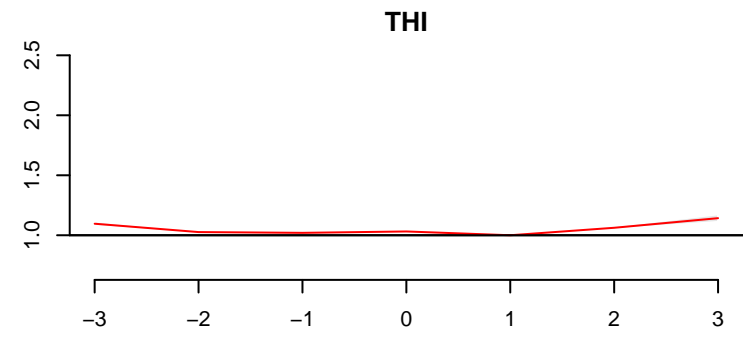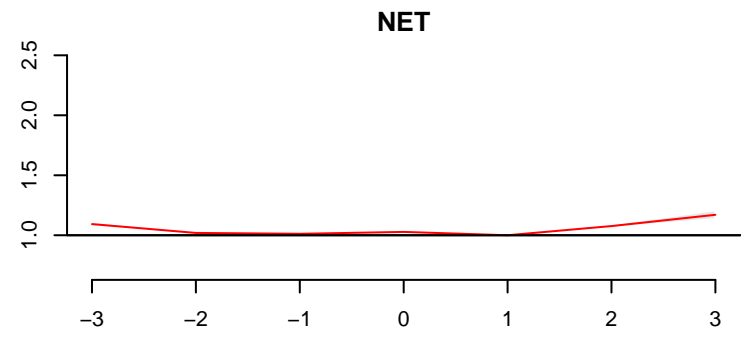

Temperature indices

Standardized values

Supplement: mmc8.pdf [file mmc8.pdf]

(a) Relative risk across lags

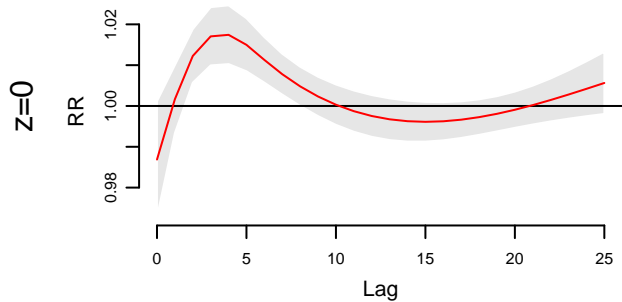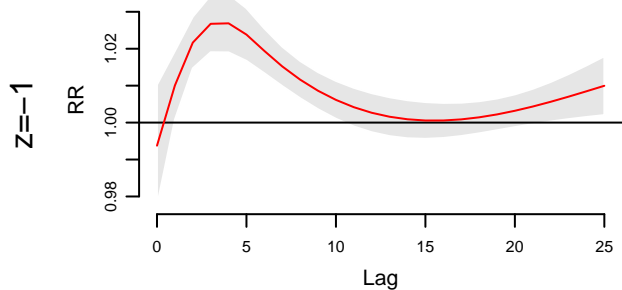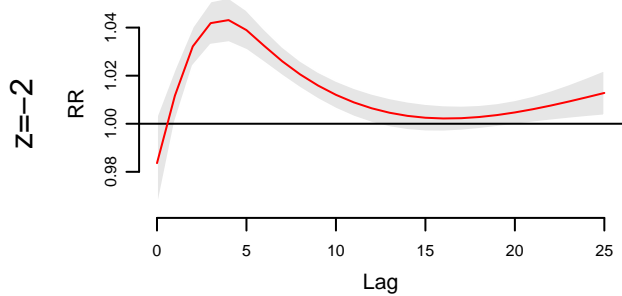

(b) Cumulative relative risk

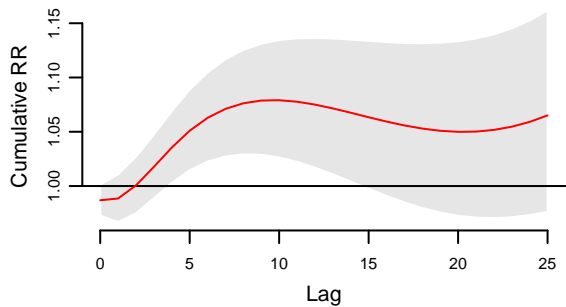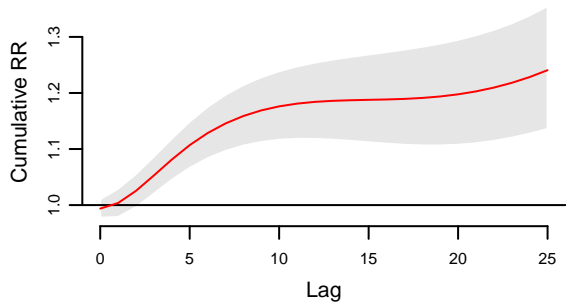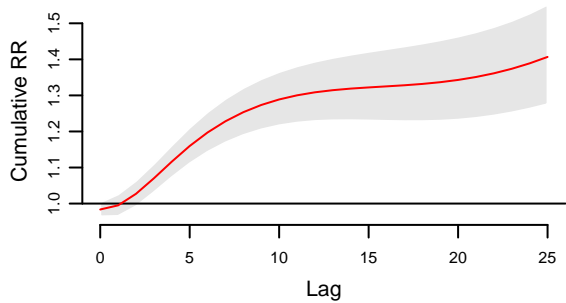

Lag day

Supplement: mmc9.pdf [file mmc9.pdf]
